# Supplementary material
Source: Springer Nature journal article supplement (https://www.springermedizin.de/resource/supplementary/12889_2013_6163_MOESM1_ESM.pdf/9496824)

■ All Males ● Aboriginal Males ▲ All Females × Aboriginal Females

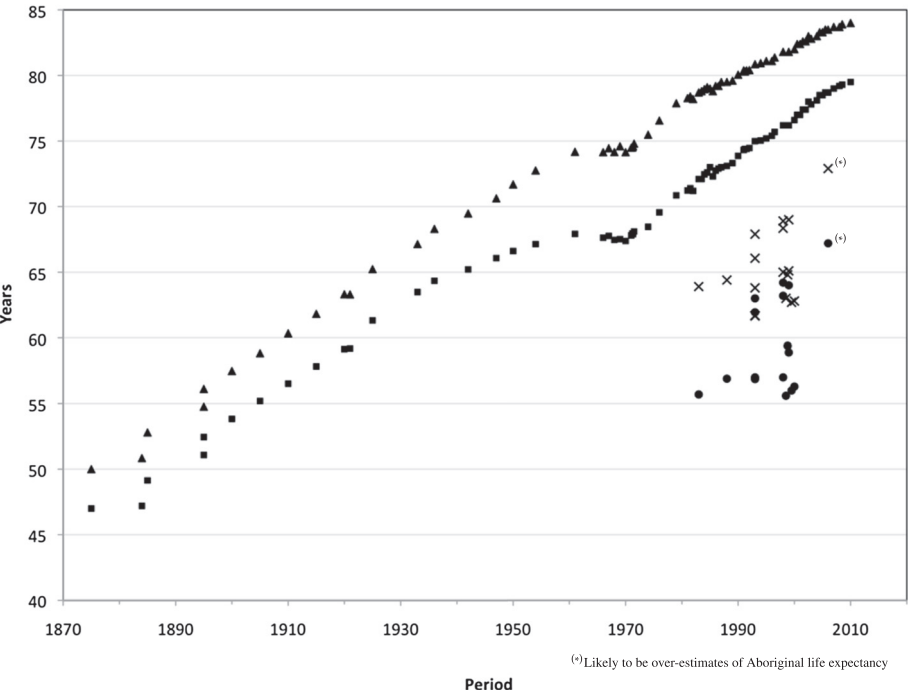

Supplement: MOESM1 [file 9496824]
